# Supplementary material for: Controlled Synthesis of Atomically Layered Hexagonal Boron Nitride via Chemical Vapor Deposition
Source: MDPI journal article supplement (doi:10.3390/molecules21121636), 2016-11-29
Supplement: s1 [file s1]

## Supplementary Materials: Controlled Synthesis of Atomically Layered Hexagonal Boron Nitride via Chemical Vapor Deposition

Juanjuan Liu, R. Govindan Kutty and Zheng Liu

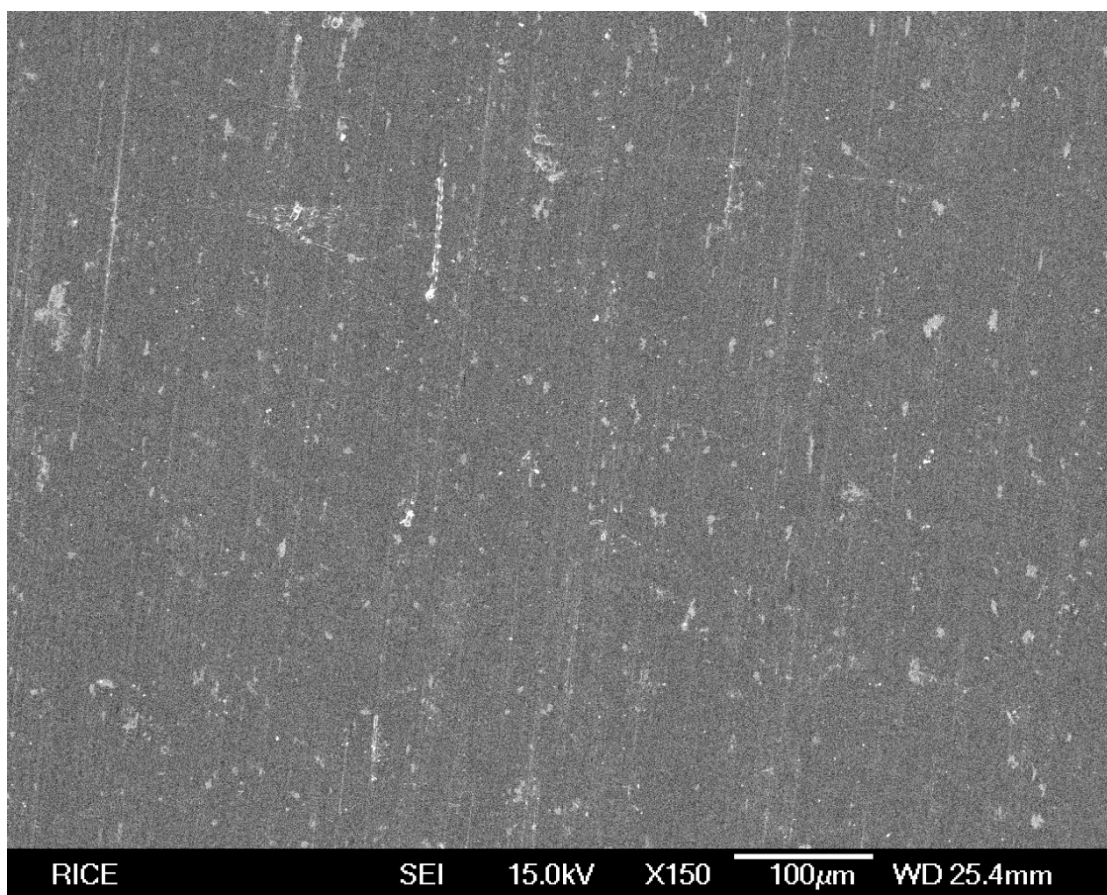

**Figure S1.** SEM image of high-coverage few-layered h-BN grown on Ni foils at low. The white areas are Ni while dark grey areas are h-BN due to their great different in electrical conductivity.

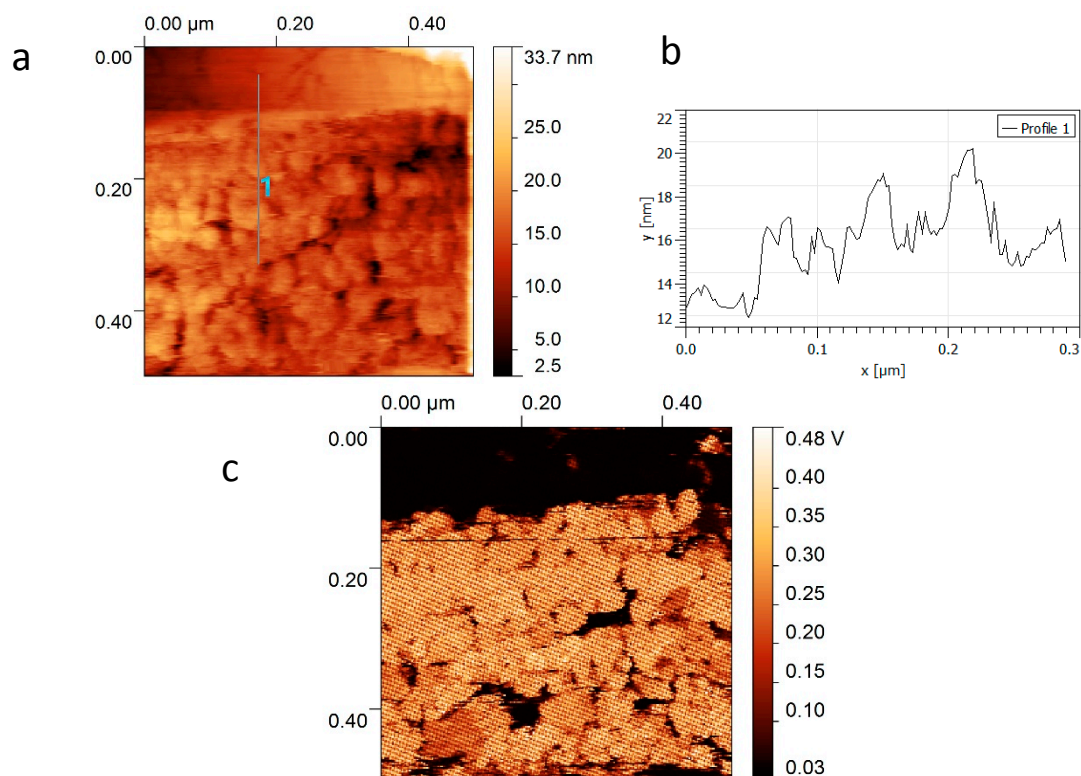

**Figure S2.** AFM image of low-coverage thick h-BN grown on Ni at high temperature. (a) Height topography of the h-BN flakes; (b) Height cross-section showing the thickness of h-BN is from 4–6 nm; (c) Electrical conductivity map of the h-BN. The yellow areas are h-BN and dark areas are Ni. The scanning size is  $0.5 \times 0.5$  micron.
